# Supplementary material for: Field evaluation of quantitative point of care diagnostics to measure glucose-6-phosphate dehydrogenase activity
Source: PLoS One. 2018 Nov 2;13(11):e0206331. doi: 10.1371/journal.pone.0206331 (PMC6214512; doi:10.1371/journal.pone.0206331)
Supplement: S1 Data — (XLSX) [file pone.0206331.s008.xlsx]

## Sheet: Sheet1
ID	SEX	AGE	G6PDn	DTSC	G6PD_FLD_SG_1	G6PD_FLD_SG_2	HB_GS_FLD1	HB_GS_FLD1	G6PD_LAB_BS1	G6PD_LAB_BS1	HB_MHD	G6PD_LAB_GS_1	G6PD_LAB_GS_1	HB_SG_LAB1	HB_SG_LAB1	HB_CBC	G6PD_SPEC_0h	G6PD_SPEC_1h	G6PD_SPEC_2h	G6PD_SPEC_4h	G6PD_SPEC_6h	G6PD_SPEC_24h	G6PD_SPEC_3d	G6PD_SPEC_6d	G6PD_SPEC_9d	G6PD_SPEC_13d	G6PD_SPEC_20d	TSPEC_0h	TSPEC_1h	TSPEC_2h	TSPEC_4h	TSPEC_6h	TSPEC_24h	DTSPEC_0h	DTSPEC_3d	DTSPEC_6d	DTSPEC_9d	DTSPEC_13d	DTSPEC_20d
ID	SEX	Age bracket	G6PD status: 1=normal, 0=deficient	Date sample collection	G6PD Field: SG1 (U/gHb)	G6PD Field: SG2 (U/gHb)	HB Field: SG1 (g/dL)	HB Field: SG1 (g/dL)	G6PD Lab: BS1 (U/dL)	G6PD Lab: BS2 (U/dL)	Hb Lab: MHD (U/dL)	G6PD Lab: SG1 (U/gHb)	G6PD Lab: SG2 (U/gHb)	Hb Lab: SG1 (U/dL)	Hb Lab: SG2 (U/dL)	Hb Lab: CBC (U/dL)	G6PD Lab: SPEC 0h (U/gHb)	G6PD Lab: SPEC 1h (U/gHb)	G6PD Lab: SPEC 2h (U/gHb)	G6PD Lab: SPEC 4h (U/gHb)	G6PD Lab: SPEC 6h (U/gHb)	G6PD Lab: SPEC 24h (U/gHb)	G6PD Lab: SPEC 3d (U/gHb)	G6PD Lab: SPEC 6d (U/gHb)	G6PD Lab: SPEC 9d (U/gHb)	G6PD Lab: SPEC 13d (U/gHb)	G6PD Lab: SPEC 20d (U/gHb)	Time Spec 0h: 24:00	Time Spec 0h (24:00)	Time Spec 2h (24:00)	Time Spec 4h (24:00)	Time Spec 6h (24:00)	Time Spec 24h (24:00)	Date Spec 0h (dd/mm/yyyy)	Date Spec 3d (dd/mm/yyyy)	Date Spec 6d (dd/mm/yyyy)	Date Spec 9d (dd/mm/yyyy)	Date Spec 13d (dd/mm/yyyy)	Date Spec 20d (dd/mm/yyyy)
1	2	20 to <50	1	Sep, 2017					131	120	11.6					12.1	8.91016											08:44:59.971000						2017-09-11
2	2	20 to <50	1	Sep, 2017					92	79	11.1					11.6	10.4581											08:44:59.971000						2017-09-11
3	2	20 to <50	0	Sep, 2017					29	9	13.4					13.5	1.09326											08:44:59.971000						2017-09-11
4	2	20 to <50	0	Sep, 2017					110	102	13.3					14.3	4.80854											09:09:59.962000						2017-09-11
5	1	20 to <50	1	Sep, 2017					124	138	14.5					14.8	10.6491											09:09:59.962000						2017-09-11
6	1	20 to <50	0	Sep, 2017					137	132	15.5					15.9	7.31632											09:09:59.962000						2017-09-11
7	2	20 to <50	0	Sep, 2017					103	47	12.5					13.2	5.12494											09:40:00.019000						2017-09-11
8	2	20 to <50	1	Sep, 2017					79	75	10.6					10.8	12.7113											09:40:00.019000						2017-09-11
9	2	20 to <50	1	Sep, 2017					73	90	9.3					8.6	12.5251											09:40:00.019000						2017-09-11
10	1	20 to <50	0	Sep, 2017					27	31	13.7					14.4	1.25008											10:05:00.010000						2017-09-11
11	2	20 to <50	0	Sep, 2017					69	60	13.1					13.5	4.72788											10:05:00.010000						2017-09-11
12	2	20 to <50	0	Sep, 2017					51	73	12.6					13.6	3.64704											10:05:00.010000						2017-09-11
13	2	20 to <50	0	Sep, 2017					67	43	12.5					13	1.71226											11:12:00.029000						2017-09-11
14	2	20 to <50	0	Sep, 2017					41	40	10					9	6.48426											11:12:00.029000						2017-09-11
15	2	20 to <50	0	Sep, 2017					51	55	10					10.9	5.3451											09:13:59.981000						2017-09-12
16	2	20 to <50	0	Sep, 2017					92	92	12.2					13	10.9287											09:13:59.981000						2017-09-12
17	2	>=50	0	Sep, 2017					99	103	13.8					14.8	7.58219											09:13:59.981000						2017-09-12
18	2	>=50	1	Sep, 2017					68	64	10.5					11.5	10.305											09:45:00						2017-09-12
19	1	>=50	0	Sep, 2017					5	23	11.7					12.3	1.27466											09:45:00						2017-09-12
20	2	20 to <50	0	Sep, 2017					78	94	13.1					12.9	6.10689											09:45:00						2017-09-12
21	1	20 to <50	0	Sep, 2017					20	24	11.7					12.8	1.21731											10:54:59.990000						2017-09-12
22	2	>=50	1	Sep, 2017					58	54	8.2					6.2	16.1716											10:54:59.990000						2017-09-12
23	2	20 to <50	0	Sep, 2017					70	75	14.6					14.5	4.85902											10:54:59.990000						2017-09-12
24	1	20 to <50	0	Sep, 2017					111	125	14.4					16.2	7.76331											11:19:59.981000						2017-09-12
25	2	20 to <50	0	Sep, 2017					76	87	12.1					14	7.60069											09:04:59.981000						2017-09-13
26	1	20 to <50	1	Sep, 2017					130	121	12.3					12.9	10.9797											09:04:59.981000						2017-09-13
27	1	>=50	1	Sep, 2017					137	111	12.8					13.8	10.1268											09:04:59.981000						2017-09-13
28	1	>=50	1	Sep, 2017					106	133	10.9					10.6	14.0879											09:38:00.010000						2017-09-13
29	1	>=50	0	Sep, 2017					35	32	13.4					14.3	0.818908											09:38:00.010000						2017-09-13
30	1	20 to <50	1	Sep, 2017					145	131	13.8					14.5	7.80915											09:38:00.010000						2017-09-13
31	2	20 to <50	0	Sep, 2017					23	17	13					12.5	0.90199											10:25:00.019000						2017-09-13
32	1	20 to <50	1	Sep, 2017					119	110	14.6					15.4	8.61908											10:25:00.019000						2017-09-13
33	2	20 to <50	1	Sep, 2017					88	101	13.8					13.9	8.24719											10:25:00.019000						2017-09-13
34	1	20 to <50	1	Sep, 2017					99	115	14					15.5	8.97244											10:57:59.962000						2017-09-13
35	1	20 to <50	1	Sep, 2017					110	96	12.4					12.8	9.52678											10:57:59.962000						2017-09-13
36	2	20 to <50	1	Sep, 2017					83	77	12.5					12.4	9.88873											10:57:59.962000						2017-09-13
37	1	20 to <50	1	Sep, 2017					136	136	15.2					15.6	11.8152											11:30:00.029000						2017-09-13
38	2	20 to <50	0	Sep, 2017					92	133	12.2					13	10.0577											11:30:00.029000						2017-09-13
39	2	20 to <50	1	Sep, 2017					85	93	12.2					12.3	10.2327											11:30:00.029000						2017-09-13
40	2	20 to <50	1	Sep, 2017					76	73	11.1					11.6	10.0368											09:45:00						2017-09-14
41	2	>=50	0	Sep, 2017					106	96	13.5					14.7	7.85432											09:45:00						2017-09-14
42	2	20 to <50	0	Sep, 2017					88	92	12.9					13.8	8.66812											09:45:00						2017-09-14
43	2	20 to <50	0	Sep, 2017					76	84	13					14.1	5.80337											10:12:00						2017-09-14
44	2	>=50	1	Sep, 2017					103	73	11.7					12.6	7.88066											10:12:00						2017-09-14
45	2	20 to <50	1	Sep, 2017					121	156	13.9					15.2	8.99354											10:12:00						2017-09-14
46	2	20 to <50	1	Sep, 2017					108	125	12.1					12.7	9.40366											10:47:00.038000						2017-09-14
47	2	20 to <50	0	Sep, 2017					88	85	12.4					13	8.42731											10:47:00.038000						2017-09-14
48	2	>=50	1	Sep, 2017					86	76	10.2					10.5	9.73791											10:47:00.038000						2017-09-14
49	1	10 to <20	1	Sep, 2017					92	107	13.4					13.7	11.5006											11:14:00.038000						2017-09-14
50	2	20 to <50	0	Sep, 2017					72	77	12.2					13	4.55238											11:14:00.038000						2017-09-14
51	2	20 to <50	0	Oct, 2017	1.7	1.5	13.2	12.2	1	3	11.4	1.7	1.5	12.7	11.6	12	1.57504											09:17:00.038000						2017-10-03
52	2	20 to <50	0	Oct, 2017	1.6	1.1	12.3	11.3	20	5	12.5	1.2	2	11.2	11.2	11	1.25975											09:17:00.038000						2017-10-03
53	2	20 to <50	0	Oct, 2017	1.5	1.7	13.4	12.7	55	58	12.3	2.3	2.6	14.5	14.6	13.8	2.55477											09:17:00.038000						2017-10-03
54	2	20 to <50	0	Oct, 2017	6.5	6.8	10.6	10.3	83	72	11	7.5	7.4	11	11	10.7	8.53688											09:33:59.990000						2017-10-03
55	1	20 to <50	0	Oct, 2017	5.6	6.1	15	13.5	99	99	13.4	10.7	8.2	14.1	14.1	14.4	8.49711											09:33:59.990000						2017-10-03
56	1	20 to <50	0	Oct, 2017	1.2	1.2	14.8	13.9	11	20	13.1	1.7	2.2	13.7	13.7	13.7	1.23166											09:33:59.990000						2017-10-03
57	1	20 to <50	0	Oct, 2017	1	1.4	17.7	14.7	21	23	13.4	2.2	2.1	14.4	14.1	14.1	0.915926											09:54:59.962000						2017-10-03
58	1	20 to <50	0	Oct, 2017	6.6	7.4	15	13	79	97	10	8.8	9.1	12.7	12.1	12.1	8.62035											09:54:59.962000						2017-10-03
59	1	20 to <50	0	Oct, 2017	1.2	1.2	17.4	16.6	42	46	14.3	1.3	1.2	17.3	14.8	16	1.11647											09:54:59.962000						2017-10-03
60	2	20 to <50	0	Oct, 2017	5.7	6.2	13.6	13.6	86	81	12.5	8.2	7.8	12.7	13.1	12.7	7.83825											10:48:00						2017-10-03
61	2	20 to <50	0	Oct, 2017	1.8	2.1	13.2	13	0	1	12.1	1.1	1.3	12	12.4	11.8	1.5578											10:45:59.990000						2017-10-04
62	1	20 to <50	0	Oct, 2017	1.3	1.4	13.1	12.4	18	13	11.4	0.9	1.3	11.4	11	11.4	1.47189											10:45:59.990000						2017-10-04
63	2	20 to <50	0	Oct, 2017	7.5	9.1	14.7	13.6	128	111	12.5	7.7	8.7	13.6	14.2	13.7	9.81889											10:45:59.990000						2017-10-04
64	2	20 to <50	0	Oct, 2017	6.1	4.7	14.1	15	85	71	11.7	6.6	6.9	13.5	13.5	13.1	8.36168											11:01:59.981000						2017-10-04
65	1	20 to <50	0	Oct, 2017	1.1	1.9	15.4	14.6	19	10	12.9	1.4	1	12.8	13	13.3	1.39628											11:01:59.981000						2017-10-04
66	2	20 to <50	0	Oct, 2017	7.8	8.4	15.6	13.9	105	102	13.3	9.9	9.4	13.9	13	13.4	10.1829											11:01:59.981000						2017-10-04
67	1	20 to <50	0	Oct, 2017	1.6	1.6	16	15.3	7	23	12.7	1.2	1.3	15.1	15.4	14.8	1.30891											11:33:00						2017-10-04
68	1	20 to <50	0	Oct, 2017	5.3	8.5	16.4	14.5	115	110	12.3	7.9	7.6	14.6	14.9	13.8	8.0161											11:33:00						2017-10-04
69	2	20 to <50	0	Oct, 2017	2.6	3	14.1	14.1	45	25	10	3.5	3.1	13.8	11.6	12.3	3.92779											11:33:00						2017-10-04
70	2	20 to <50	0	Oct, 2017	1.5	1.5	10.8	11	40	2	12.1	1	1	10.1	9	9.5	2.0441											11:50:00.038000						2017-10-04
71	1	20 to <50	0	Oct, 2017	1.5	1	15.4	15.4	28	2	12.7	1.2	1	13.7	12.9	12.5	1.1953											11:50:00.038000						2017-10-04
72	1	20 to <50	0	Oct, 2017	1	1.3	15.4	14.2	5	2	12.5	1.3	2	14.3	14	13.4	1.76223											11:50:00.038000						2017-10-04
73	2	20 to <50	0	Oct, 2017	5	6.6	15.6	13.9	56	121	12.5	8	8.5	13.5	13.3	13	8.33536											12:11:00.010000						2017-10-04
74	1	>=50	0	Oct, 2017	1.5	1.7	14.1	13.1	23	11	12	1.8	1.7	12.6	11	12.1	0.927087											12:11:00.010000						2017-10-04
75	1	20 to <50	0	Oct, 2017	0.5	1.3	18.1	15.5	22	18	12.7	1.5	1.1	13.6	14	12.9	1.07055											09:45:00						2017-10-05
76	2	>=50	0	Oct, 2017	5.4	2.9	10.4	9.300000000000001	88	98	12.2	8.9	8.8	13.2	12.5	12.8	9.36777											09:45:00						2017-10-05
77	2	>=50	0	Oct, 2017	1.7	2.6	12.6	12.1	29	53	11.8	3.7	3.8	12.5	11.3	11.8	3.27138											09:45:00						2017-10-05
78	1	>=50	0	Oct, 2017	1.3	1.8	14	13.2	7	15	12	1.6	1.5	12.7	12.7	12.4	1.23535											10:48:59.962000						2017-10-05
79	2	>=50	0	Oct, 2017	4.9	4.5	16.6	14.6	79	95	12.8	5.9	6.9	14.3	13.7	13.3	6.31517											10:48:59.962000						2017-10-05
80	2	20 to <50	0	Oct, 2017	3.4	2.4	16.5	14.2	61	66	12.3	5.8	6.1	11.7	12.9	12.7	4.91746											10:48:59.962000						2017-10-05
81	2	20 to <50	0	Oct, 2017	8	6.4	13.0	13.5	94	91	11.6	12.2	9.9	12.3	12.8	11.7	10.1035											11:03:00.029000						2017-10-05
82	2	20 to <50	0	Oct, 2017	2.7	5.4	12.3	11.2	23	53	9	6.9	2.2	9.6	10.1	9.5	5.6957											11:03:00.029000						2017-10-05
83	1	>=50	0	Oct, 2017	1.4	1.9	15.9	14.5	26	60	12.6	2.1	1.3	12.7	14.3	12.9	1.1144											11:03:00.029000						2017-10-05
84	2	20 to <50	0	Oct, 2017	9	8.2	13.9	14.6	110	116	11.7	10.4	7.5	12.3	14.1	12.2	9.64303											11:21:59.990000						2017-10-05
85	2	20 to <50	0	Oct, 2017	6.2	6	13.6	13.5	144	141	11.1	7.6	7	12.6	11.7	12	8.84145											09:20:00.010000						2017-10-10
86	2	20 to <50	0	Oct, 2017	3.9	3.8	15.6	15.6	127	112	12.9	5	4.9	13	13.5	13.9	6.14769											09:20:00.010000						2017-10-10
87	1	20 to <50	0	Oct, 2017	1.2	2	16.3	13.7	57	60	13.8	1.8	1.7	15.2	15	14.6	2.11778											09:33:00.029000						2017-10-11
88	2	>=50	0	Oct, 2017	7.8	8.6	13	12	121	105	11	9.6	9.7	11.7	11.6	10.4	13.0433											09:33:00.029000						2017-10-11
90	2	>=50	0	Oct, 2017	2.3	1.8	11.5	10.9	58	35	10.6	1.9	2	11.6	10.6	10.7	1.62544											10:32:00.010000						2017-10-11
91	2	20 to <50	0	Oct, 2017	4.6	6.2	14.1	12.5	119	121	12.3	5.9	6.5	12.9	12.7	12.2	5.96122											10:32:00.010000						2017-10-11
92	2	20 to <50	0	Oct, 2017	4.4	5.4	12.6	11.2	97	98	10.6	9.5	8.3	11.2	10.6	11	7.46851											10:32:00.010000						2017-10-11
93	2	>=50	0	Oct, 2017	0.9	1.6	13.6	12	39	7	12	1.6	1.3	12.5	12.8	12.1	1.40232											10:50:59.971000						2017-10-11
94	1	20 to <50	0	Oct, 2017	1.3	2.4	15.9	13.5	34	35	15.1	1.3	1.3	15.8	15.5	15	0.967806											10:50:59.971000						2017-10-11
95	2	20 to <50	0	Oct, 2017	1.3	0.9	13.2	13.1	33	38	11.9	1.9	1.7	12.9	12.4	12.5	1.01808											10:50:59.971000						2017-10-11
96	2	20 to <50	0	Oct, 2017	3.7	6.7	14.3	11.7	86	69	12	5.6	6.5	12.6	12.8	15.5	4.81673											11:26:00.010000						2017-10-11
97	1	20 to <50	0	Oct, 2017	1.7	1.9	12.9	11.9	34	41	12.3	1.4	1.4	12.4	12.7	12.7	1.04287											11:26:00.010000						2017-10-11
98	2	20 to <50	0	Oct, 2017	6.3	7.4	13.5	13.5	91	98	12.8	6	7.1	13.7	13.3	12.6	9.73343	11.8657	7.8032	8.92168	9.74465	9.9242	8.13613	8.09872	7.15605	7.22338	5.45775	09:40:00.019000	10:47:00.038000	11:48:00.029000	13:54:59.990000	15:54:59.962000	2017-10-17	2017-10-16	2017-10-19	2017-10-22	2017-10-25	2017-10-29	2017-11-05
99	2	20 to <50	0	Oct, 2017	4.1	4.6	13.7	14	66	70	12.5	4.9	4.4	13.3	13.8	12.6	6.47149	6.6922	5.6822	5.52508	5.36049	5.13605	5.5176	5.28568	5.20712	5.02008	4.90786	09:40:00.019000	10:47:00.038000	11:48:00.029000	13:54:59.990000	15:54:59.962000	2017-10-17	2017-10-16	2017-10-19	2017-10-22	2017-10-25	2017-10-29	2017-11-05
100	2	20 to <50	1	Oct, 2017	6.7	5.3	16	15.3	102	100	13	7.2	7.2	14.8	14.1	13.6	8.88604	11.3155	7.25716	8.69196	8.88257	11.0105	8.8999	8.74048	7.21557	7.54481	7.16705	09:40:00.019000	10:47:00.038000	11:48:00.029000	13:54:59.990000	15:54:59.962000	2017-10-17	2017-10-16	2017-10-19	2017-10-22	2017-10-25	2017-10-29	2017-11-05
101	2	>=50	0	Oct, 2017	5.7	6.8	12.8	13	75	81	12	6.7	5.7	12.2	12.7	12.4	7.70859	7.13463	7.33229	7.11182	7.89865	7.63638	7.35129	7.34749	7.7352	6.89516	4.43586	09:54:59.962000	11:05:00.038000	12:04:59.981000	14:19:59.981000	16:30:00	2017-10-17	2017-10-16	2017-10-19	2017-10-22	2017-10-25	2017-10-29	2017-11-05
102	2	20 to <50	0	Oct, 2017	7.2	5	10.4	11.6	87	71	11.3	6	6.3	10.3	11.1	10.6	7.79035	7.35459	6.83879	6.75875	7.18118	7.19896	7.15005	7.87484	7.2212	6.95885	5.95838	09:54:59.962000	11:05:00.038000	12:04:59.981000	14:19:59.981000	16:30:00	2017-10-17	2017-10-16	2017-10-19	2017-10-22	2017-10-25	2017-10-29	2017-11-05
103	2	20 to <50	0	Oct, 2017	6.6	6.3	13.5	12.5	85	77	12.3	7.2	6.8	12.6	12.1	12.1	9.71883	8.44896	7.93088	8.05943	8.42948	9.22802	8.95925	8.44506	8.88523	8.15291	5.76119	09:54:59.962000	11:05:00.038000	12:04:59.981000	14:19:59.981000	16:30:00	2017-10-17	2017-10-16	2017-10-19	2017-10-22	2017-10-25	2017-10-29	2017-11-05
104	2	10 to <20	0	Oct, 2017	6.7	6.4	14.8	15	107	120	14.1	5.8	5.9	15.7	14.7	14.4	7.91121	8.83424	6.76561	6.19281	7.30241	6.35319	6.70342	7.39733	6.35974	6.78852	4.79517	09:15:00.029000	10:32:00.010000	11:26:00.010000	13:48:00	15:20:00.010000	2017-10-24	2017-10-23	2017-10-26	2017-10-29	2017-11-01	2017-11-05	2017-11-12
105	2	20 to <50	0	Oct, 2017	5.2	4.6	13.3	14.2	92	63	13.2	5.4	4.4	13.1	13.3	13.2	6.07378	5.75242	6.17019	6.12377	6.50941	5.64887	5.08113	6.10592	6.09164	5.88097	4.88474	09:15:00.029000	10:32:00.010000	11:26:00.010000	13:48:00	15:20:00.010000	2017-10-24	2017-10-23	2017-10-26	2017-10-29	2017-11-01	2017-11-05	2017-11-12
106	2	20 to <50	0	Oct, 2017	4.6	5.9	15.5	15.5	84	111	13.5	5.9	6.8	13.6	13.8	13.9	7.00559	7.0734	7.3345	7.6702	7.32094	9.05708	7.16496	7.39215	7.04289	6.59529	3.97413	09:15:00.029000	10:32:00.010000	11:26:00.010000	13:48:00	15:20:00.010000	2017-10-24	2017-10-23	2017-10-26	2017-10-29	2017-11-01	2017-11-05	2017-11-12
107	2	20 to <50	0	Oct, 2017	4.6	5.6	16.2	14.3	78	88	14	6.3	6.3	14.5	14.5	13.7	7.44502	6.77758	8.82806	8.5081	7.12506	6.50235	7.72025	7.23515	6.63308	6.24088	4.20416	09:35:00.038000	10:48:00	11:37:59.981000	14:01:00.019000	15:35:00.038000	2017-10-24	2017-10-23	2017-10-26	2017-10-29	2017-11-01	2017-11-05	2017-11-12
108	2	20 to <50	0	Oct, 2017	4.6	6.2	14.4	14.7	78	83	13.1	4.8	6.2	13.5	13.4	13.7	6.68125	7.06313	6.78446	8.20878	8.48402	6.13423	7.30396	7.33148	6.37161	6.24776	5.09867	09:35:00.038000	10:48:00	11:37:59.981000	14:01:00.019000	15:35:00.038000	2017-10-24	2017-10-23	2017-10-26	2017-10-29	2017-11-01	2017-11-05	2017-11-12
109	2	>=50	0	Oct, 2017	5.2	5.5	14.1	12.9	65	72	12.1	5.7	5.8	11.3	12.8	12	7.2939	7.60026	7.52171	7.89485	8.05982	7.49814	7.9302	7.78487	6.91683	6.09199	4.14381	09:35:00.038000	10:48:00	11:37:59.981000	14:01:00.019000	15:35:00.038000	2017-10-24	2017-10-23	2017-10-26	2017-10-29	2017-11-01	2017-11-05	2017-11-12
110	1	>=50	0	Oct, 2017	7.2	7	16.4	15.9	111	119	13.5	6.8	7.7	15.3	15.7	14.5	9.58596	7.33331	7.5641	8.02568	8.63679	9.87852	7.81765	9.46894	9.96303	9.27391	8.29223	09:27:59.962000	10:36:00.029000	11:37:59.981000	13:34:59.981000	15:35:00.038000	2017-10-31	2017-10-30	2017-11-02	2017-11-05	2017-11-08	2017-11-12	2017-11-19
111	2	>=50	0	Oct, 2017	2.6	3.1	15.2	14.4	74	74	12.6	2.4	2.6	14.5	13.2	12.9	4.527	3.51857	4.56719	3.93509	4.60738	4.82296	3.60991	3.92413	4.85219	4.41373	3.62087	09:27:59.962000	10:36:00.029000	11:37:59.981000	13:34:59.981000	15:35:00.038000	2017-10-31	2017-10-30	2017-11-02	2017-11-05	2017-11-08	2017-11-12	2017-11-19
112	2	20 to <50	0	Oct, 2017	10.9	9.9	12.1	11.9	90	103	11.8	7.9	7.1	12.5	12.4	11.9	10.4327	10.1	10.4446	8.03249	10.1238	12.1992	10.2743	11.1457	10.1951	10.5159	5.86989	09:27:59.962000	10:36:00.029000	11:37:59.981000	13:34:59.981000	15:35:00.038000	2017-10-31	2017-10-30	2017-11-02	2017-11-05	2017-11-08	2017-11-12	2017-11-19
113	2	20 to <50	0	Oct, 2017	3.3	5.2	14.5	13.2	86	74	11.6	5.5	6.3	13.1	11.8	11.8	8.36019	8.12053	8.48002	7.91682	6.62664	8.9873	8.2803	8.09257	9.17903	8.36419	6.92622	09:42:59.990000	10:50:59.971000	11:50:00.038000	13:48:59.962000	15:47:00.010000	2017-10-31	2017-10-30	2017-11-02	2017-11-05	2017-11-08	2017-11-12	2017-11-19
114	2	20 to <50	0	Oct, 2017	11.2	13.3	9	7.9	30	71	9.3	12.5	12.4	9.1	8.1	8.2	15.6632	15.6747	15.7322	15.7552	13.8181	12.9559	15.3816	14.2952	15.4333	13.7722	12.5766	09:42:59.990000	10:50:59.971000	11:50:00.038000	13:48:59.962000	15:47:00.010000	2017-10-31	2017-10-30	2017-11-02	2017-11-05	2017-11-08	2017-11-12	2017-11-19
115	2	20 to <50	0	Oct, 2017	3	4.1	14.2	14.5	49	55	12.4	3.8	4.3	13.5	12.8	13	4.97439	5.16655	5.39859	5.02152	4.39428	4.62995	4.76048	6.40289	4.73147	4.74597	3.40811	09:42:59.990000	10:50:59.971000	11:50:00.038000	13:48:59.962000	15:47:00.010000	2017-10-31	2017-10-30	2017-11-02	2017-11-05	2017-11-08	2017-11-12	2017-11-19
116	1	20 to <50	0	Nov, 2017	0.8	1.2	16.2	15.6			13.9	0.9	0.8	16.1	14.9	14.9	0.759196	0.904709	0.471334	0.756033	0.996445	0.468171	0.911035	0.825626	0.325822	0.230922	0.05694	09:15:00.029000	10:32:59.971000	11:21:59.990000	13:21:59.962000	15:24:59.990000	2017-11-07	2017-11-06	2017-11-09	2017-11-12	2017-11-15	2017-11-19	2017-11-26
117	1	20 to <50	0	Nov, 2017	1.4	1.4	19.2	17.1			14.8	1.4	0	15.8	15.6	15.4	2.01388	0.70088	1.09876	1.28852	1.16303	1.07733	1.30076	0.860032	0.768214	0.388698	0.339728	09:15:00.029000	10:32:59.971000	11:21:59.990000	13:21:59.962000	15:24:59.990000	2017-11-07	2017-11-06	2017-11-09	2017-11-12	2017-11-15	2017-11-19	2017-11-26
118	1	>=50	0	Nov, 2017	0.9	1.4	16.4	16.8			14.2	0.7	1	15.1	14.8	14.6	1.45274	1.39463	1.17188	1.28487	1.39463	1.65935	1.38172	1.27519	1.02338	0.3648	0.167872	09:15:00.029000	10:32:59.971000	11:21:59.990000	13:21:59.962000	15:24:59.990000	2017-11-07	2017-11-06	2017-11-09	2017-11-12	2017-11-15	2017-11-19	2017-11-26
119	2	20 to <50	0	Nov, 2017	2.2	2.1	15.5	15.3			13.8	2	2.2	15.6	15.1	14.7	3.06528	2.82801	2.57791	2.63883	3.01397	2.64204	3.20635	2.96267	2.32781	2.00077	1.47492	09:45:59.962000	10:54:00.029000	11:41:00.038000	13:38:00.038000	15:45:00	2017-11-07	2017-11-06	2017-11-09	2017-11-12	2017-11-15	2017-11-19	2017-11-26
120	2	20 to <50	0	Nov, 2017	1.4	1.5	13.3	12.2			11.8	0.8	0.9	12.9	11.9	11.9	2.30914	2.09922	1.98436	1.86949	2.10714	1.52094	1.32686	1.81404	1.02981	0.895139	0.174275	09:45:59.962000	10:54:00.029000	11:41:00.038000	13:38:00.038000	15:45:00	2017-11-07	2017-11-06	2017-11-09	2017-11-12	2017-11-15	2017-11-19	2017-11-26
121	2	20 to <50	0	Nov, 2017	1.2	1.7	12.9	11.6			12.5	1.1	1.1	12.5	11.2	12	2.18385	1.36294	2.02281	1.95211	1.99531	1.52791	1.38651	0.467406	0.455623	0.349573	0.043206	09:45:59.962000	10:54:00.029000	11:41:00.038000	13:38:00.038000	15:45:00	2017-11-07	2017-11-06	2017-11-09	2017-11-12	2017-11-15	2017-11-19	2017-11-26
122	2	10 to <20	1	Nov, 2017	8.3	8.4	13.1	12.8	115	104	11.8	9	8.9	11.8	11.2	11.7	10.2042	10.6473	11.735	11.4047	9.92219	10.4741	10.0712	10.7601	11.0905	10.5023	8.82241	09:17:00.038000	10:29:00.038000	11:19:59.981000	13:18:00.029000	15:18:00	2017-11-14	2017-11-13	2017-11-16	2017-11-19	2017-11-22	2017-11-26	2017-12-03
123	2	20 to <50	1	Nov, 2017	6	7.4	14.9	12.9	96	88	12	7.9	7.3	13	12.9	12.6	9.2995	9.62869	8.15857	9.60624	9.5838	10.4105	8.15857	10.3694	10.2983	8.98528	8.35309	09:17:00.038000	10:29:00.038000	11:19:59.981000	13:18:00.029000	15:18:00	2017-11-14	2017-11-13	2017-11-16	2017-11-19	2017-11-22	2017-11-26	2017-12-03
124	2	20 to <50	0	Nov, 2017	4.3	4	12.1	12.8	57	55	11.1	3.3	4	12.3	10.5	11.2	4.16205	4.44822	4.86063	4.86905	5.2983	4.75963	5.05422	5.82434	5.08368	4.44401	4.75543	09:17:00.038000	10:29:00.038000	11:19:59.981000	13:18:00.029000	15:18:00	2017-11-14	2017-11-13	2017-11-16	2017-11-19	2017-11-22	2017-11-26	2017-12-03
125	2	20 to <50	1	Nov, 2017	5	7.8	13.1	12.4	63	56	10.7	5.8	6.4	10.7	11.3	11	8.12837	7.60562	6.91147	7.23284	8.37689	6.91576	6.85577	8.61256	8.11123	6.7915	6.41015	09:31:00.019000	10:43:00.019000	11:35:59.971000	13:29:00.038000	15:31:59.981000	2017-11-14	2017-11-13	2017-11-16	2017-11-19	2017-11-22	2017-11-26	2017-12-03
126	2	20 to <50	1	Nov, 2017	4.8	7.2	15.1	14.8	97	100	12.8	6.5	5.8	13.5	13.6	12.6	9.87183	8.59998	10.1674	9.26957	8.8132	8.01268	9.12368	10.8706	9.0975	7.94535	8.57379	09:31:00.019000	10:43:00.019000	11:35:59.971000	13:29:00.038000	15:31:59.981000	2017-11-14	2017-11-13	2017-11-16	2017-11-19	2017-11-22	2017-11-26	2017-12-03
127	1	10 to <20	0	Nov, 2017	1.6	1.7	15.1	15.3	27	24	14.4	1.2	1.3	15.3	15.1	14.5	1.58953	1.63829	1.67405	1.4205	1.6773	1.26123	0.887409	1.1312	0.763887	0.406323	0.237292	09:31:00.019000	10:43:00.019000	11:35:59.971000	13:29:00.038000	15:31:59.981000	2017-11-14	2017-11-13	2017-11-16	2017-11-19	2017-11-22	2017-11-26	2017-12-03
128	1	20 to <50	1	Nov, 2017	9.3	9.5	13.8	14	95	102	11.9	8.8	8.2	13.8	13.9	12.7	11.2601	10.6663	10.0762	10.837	9.42297	10.5438	8.94793	9.63452	11.1524	9.96482	10.065	09:13:59.981000	10:29:00.038000	11:37:00.019000	13:18:00.029000	15:17:00.038000	2017-11-21	2017-11-20	2017-11-23	2017-11-26	2017-11-29	2017-12-03	2017-12-10
129	2	>=50	1	Nov, 2017	6.7	8.5	14	13.3	96	97	11.7	8.8	8.9	12	11.7	12.2	11.4743	8.88195	10.0487	10.0255	11.0107	8.44925	8.1479	10.3423	10.238	9.6469	8.17881	09:13:59.981000	10:29:00.038000	11:37:00.019000	13:18:00.029000	15:17:00.038000	2017-11-21	2017-11-20	2017-11-23	2017-11-26	2017-11-29	2017-12-03	2017-12-10
130	2	20 to <50	1	Nov, 2017	7.5	8.3	13.8	12.7	107	110	11	9.5	8.4	13.1	12.7	12.2	11.2425	11.3468	10.2264	11.37	12.699	9.89802	9.85166	11.2618	13.4021	11.71	11.4588	09:13:59.981000	10:29:00.038000	11:37:00.019000	13:18:00.029000	15:17:00.038000	2017-11-21	2017-11-20	2017-11-23	2017-11-26	2017-11-29	2017-12-03	2017-12-10
131	2	20 to <50	1	Nov, 2017	5.5	7.2	14.3	15.1	131	107	12.7	6.6	7.1	14.4	12.7	13	8.5094	6.60956	9.11125	9.02424	9.23452	8.14321	8.91547	7.81327	8.73419	7.60298	5.47835	09:40:59.981000	10:45:59.990000	11:51:00	13:29:00.038000	15:29:00.010000	2017-11-21	2017-11-20	2017-11-23	2017-11-26	2017-11-29	2017-12-03	2017-12-10
132	2	20 to <50	1	Nov, 2017	7.1	7	15.1	15.4	114	116	12.7	6.7	7	14.3	14.3	14.1	8.31353	7.78871	8.48402	8.59767	8.42385	7.34078	8.11631	7.72186	7.70514	5.48219	4.19855	09:40:59.981000	10:45:59.990000	11:51:00	13:29:00.038000	15:29:00.010000	2017-11-21	2017-11-20	2017-11-23	2017-11-26	2017-11-29	2017-12-03	2017-12-10
133	2	20 to <50	1	Nov, 2017	5.9	7.4	15.1	14.5	108	94	12.5	6.7	8	13.5	14.5	13.5	7.81018	8.35134	8.71096	8.59574	6.52536	7.77876	8.59574	8.92742	8.26057	7.32488	6.35778	09:40:59.981000	10:45:59.990000	11:51:00	13:29:00.038000	15:29:00.010000	2017-11-21	2017-11-20	2017-11-23	2017-11-26	2017-11-29	2017-12-03	2017-12-10
134	2	20 to <50	1	Nov, 2017	8.9	10.9	11.8	11.1	94	81	11.3	10.3	10.6	11.6	11	11.3	10.9158	11.3913	11.5915	10.9783	11.1785	10.069	8.34637	11.8626	11.2995	10.7739	7.78327	09:18:59.962000	10:29:00.038000	11:21:59.990000	13:20:00.038000	15:24:00.029000	2017-11-28	2017-11-27	2017-11-30	2017-12-03	2017-12-06	2017-12-10	2017-12-17
135	2	20 to <50	1	Nov, 2017	5.7	6.7	14.1	12.2	89	106	12.5	6.7	7.5	14.1	13.1	12.9	7.49385	7.34039	6.72291	6.72656	7.33308	7.31847	7.12117	7.16866	7.71307	7.23443	5.0568	09:18:59.962000	10:29:00.038000	11:21:59.990000	13:20:00.038000	15:24:00.029000	2017-11-28	2017-11-27	2017-11-30	2017-12-03	2017-12-06	2017-12-10	2017-12-17
136	2	>=50	1	Nov, 2017	10.8	13.1	12.6	13.2	92	115	11.8	13.3	12.5	12.6	13.3	11.9	12.2745	12.1477	12.9597	10.1357	12.2864	11.3437	11.3912	12.4805	11.6051	12.9993	10.1832	09:18:59.962000	10:29:00.038000	11:21:59.990000	13:20:00.038000	15:24:00.029000	2017-11-28	2017-11-27	2017-11-30	2017-12-03	2017-12-06	2017-12-10	2017-12-17
137	2	20 to <50	1	Nov, 2017	7.5	8.3	13.5	13.7	88	96	12.6	9.4	7.8	14.5	13	12.5	9.2834	8.19745	9.53603	9.47947	8.74796	9.53603	9.10618	9.61145	9.73588	8.62353	7.59037	09:31:59.981000	10:48:59.962000	11:41:00.038000	13:34:00.019000	15:36:59.962000	2017-11-28	2017-11-27	2017-11-30	2017-12-03	2017-12-06	2017-12-10	2017-12-17
138	1	20 to <50	1	Nov, 2017	11.2	11.2	16.7	16.5	124	98	14.3	7.9	8.1	16.3	16.5	15.5	8.13736	9.44189	9.96492	9.34458	10.3967	9.83112	9.08611	9.79767	9.56048	9.50575	7.84543	09:31:59.981000	10:48:59.962000	11:41:00.038000	13:34:00.019000	15:36:59.962000	2017-11-28	2017-11-27	2017-11-30	2017-12-03	2017-12-06	2017-12-10	2017-12-17
139	2	20 to <50	1	Nov, 2017	11.4	12.9	13.1	12.8	74	92	12.1	8	9	13.7	12.6	12	10.6089	10.5697	9.01427	10.8093	10.77	11.2649	10.0433	10.4597	10.4008	10.3694	8.60185	09:31:59.981000	10:48:59.962000	11:41:00.038000	13:34:00.019000	15:36:59.962000	2017-11-28	2017-11-27	2017-11-30	2017-12-03	2017-12-06	2017-12-10	2017-12-17
140	2	20 to <50	1	Dec, 2017	10.7	9.9	16.8	18.1	90	103	12	11.5	9.2	13.3	14.9	13.5	12.9041	12.2931	13.2497	11.5459	12.3874	10.9908	12.8447	12.1849	11.5669	11.0048	11.6367	08:51:59.962000	09:53:00.038000	11:01:59.981000	13:00:59.990000	14:57:59.990000	2017-12-05	2017-12-04	2017-12-07	2017-12-10	2017-12-13	2017-12-17	2017-12-23
141	2	20 to <50	0	Dec, 2017		3.9	Error	23.8	83	85	12	8.7	6.6	12	13.4	14.7	6.62112	7.19186	7.32011	6.87443	6.68846	6.72052	7.1117	6.69487	6.82633	5.54058	6.02795	08:51:59.962000	09:53:00.038000	11:01:59.981000	13:00:59.990000	14:57:59.990000	2017-12-05	2017-12-04	2017-12-07	2017-12-10	2017-12-13	2017-12-17	2017-12-23
142	2	20 to <50	1	Dec, 2017	8.3		21.9	Error	113	121	13.5	12.6	10.4	15.1	15.1	14.5	11.7378	10.7237	9.93378	10.6359	9.94678	10.2198	10.8699	10.6554	10.015	8.68555	9.19914	08:51:59.962000	09:53:00.038000	11:01:59.981000	13:00:59.990000	14:57:59.990000	2017-12-05	2017-12-04	2017-12-07	2017-12-10	2017-12-13	2017-12-17	2017-12-23
143	2	20 to <50	0	Dec, 2017	6.5	6.3	16.8	16.9	77	99	12.8	4.9	7.5	13.9	13.8	14.2	6.81111	8.89892	6.86754	8.06911	6.66174	7.11316	7.22934	7.83012	6.6186	5.77882	3.77731	09:11:59.971000	10:32:00.010000	11:17:00.010000	13:16:59.981000	15:11:59.971000	2017-12-05	2017-12-04	2017-12-07	2017-12-10	2017-12-13	2017-12-17	2017-12-23
144	2	20 to <50	1	Dec, 2017	6.9	6.7	17.3	24.9	87	113	12.6	8.5	10.3	12.9	13.5	12.7	10.3063	9.77555	10.3656	10.4399	9.74586	9.70132	8.89597	10.039	10.1949	9.15205	8.89226	09:11:59.971000	10:32:00.010000	11:17:00.010000	13:16:59.981000	15:11:59.971000	2017-12-05	2017-12-04	2017-12-07	2017-12-10	2017-12-13	2017-12-17	2017-12-23
145	2	20 to <50	1	Dec, 2017	5.7	8.7	24.6	21.4	90	85	11.5	7.5	10.7	12.4	12.8	12.1	9.53575	10.2681	9.96034	10.4823	10.198	10.2408	10.1162	10.0655	9.89412	8.62035	9.51238	09:11:59.971000	10:32:00.010000	11:17:00.010000	13:16:59.981000	15:11:59.971000	2017-12-05	2017-12-04	2017-12-07	2017-12-10	2017-12-13	2017-12-17	2017-12-23
146	2	20 to <50	1	Dec, 2017	4.9	10.7	24	12.3	80	89	11.9	7.9	7.5	12.1	12.7	12.1	9.73442	10.0616	11.3821	10.4122	10.0266	8.71384	10.8719	10.3849	9.81622	9.06052	8.48791	09:27:00	10:48:00	11:33:59.962000	13:30:59.962000	15:27:59.962000	2017-12-05	2017-12-04	2017-12-07	2017-12-10	2017-12-13	2017-12-17	2017-12-23
147	2	20 to <50	1	Dec, 2017	7.9	12.6	18.4	11.3	65	101	12	8.7	6.5	13.3	12.9	12.4	9.63194	11.2626	10.7038	10.3732	9.8182	9.57493	10.8863	10.5746	10.7799	9.4799	9.30505	09:27:00	10:48:00	11:33:59.962000	13:30:59.962000	15:27:59.962000	2017-12-05	2017-12-04	2017-12-07	2017-12-10	2017-12-13	2017-12-17	2017-12-23
148	2	20 to <50	0	Dec, 2017	7.6	13.9	13.4	13.6	89	81	13.2	3.1	3.3	13.9	13.9	12.3	5.30347											09:33:00.029000						2017-12-18
149	2	20 to <50	0	Dec, 2017	3.3	3.8	15.3	14.1	59	42	11.1	3.3	4.4	12.7	11.8	13.2	3.49216											09:33:00.029000						2017-12-18
151	2	20 to <50	0	Dec, 2017	7.5	9	14.2	13.8	92	96	12.9	7	7.7	14.1	13.8	13.3	8.93409											09:49:00.019000						2017-12-18
152	2	20 to <50	0	Dec, 2017	5.3	6.9	15.8	13.8	71	90	12.2	5.4	5.8	14.8	14	13.1	7.22113											09:49:00.019000						2017-12-18
153	2	20 to <50	0	Dec, 2017	5.1	6.2	13.6	12.2	65	71	11	3.9	4.9	12.8	11.4	11.3	5.54339											09:42:59.990000						2017-12-20
154	2	20 to <50	0	Dec, 2017	1.6	2.2	12.7	11.5	24	16	11.5	1.1	1.2	12.2	11.6	11.1	2.39064											09:42:59.990000						2017-12-20
155	2	20 to <50	0	Dec, 2017	10.5	10.2	12.7	11.7	88	85	10.8	8.7	9.6	12.2	12.4	11.2	11.6487											09:36:59.962000						2017-12-20
156	2	10 to <20	0	Dec, 2017	7.6	5.4	13.9	16	79	73	11.9	7.1	6.4	13	12.7	12.3	9.11629											14:17:59.971000						2017-12-21
157	2	20 to <50	0	Dec, 2017	7.4	8.3	14.6	14.8	99	96	12.7	7.6	8.2	13.5	13.8	13	8.99161											14:17:59.971000						2017-12-21
158	2	20 to <50	0	Dec, 2017	4.5	4.4	11.8	10.9	55	76	11	3.1	3.4	11.3	11.4	10.8	4.16345											14:17:59.971000						2017-12-21
159	1	20 to <50	0	Dec, 2017	4.2	5.8	20.7	16	93	129	14.2	6.9	7.1	15.8	16.4	15.4	6.09368											09:22:00.019000						2017-12-24
160	1	20 to <50	0	Dec, 2017	3.9	5.8	20.1	14.7	65	71	13.1	6.6	7.3	15.2	14.9	14.3	8.19396											09:22:00.019000						2017-12-24
