# Supplementary material for: Field evaluation of quantitative point of care diagnostics to measure glucose-6-phosphate dehydrogenase activity
Source: PLOS journal article supplement (doi:10.1371/journal.pone.0206331), 2018-11-02
Supplement: S2 (10.1371/journal.pone.0206331.s002) [file journal.pone.0206331.s002]

**Supp. Figure 2: Repeatability of two measurements of the STANDARD™ G6PD in the field- a) Scatter plot and b) Bland – Altman plot**

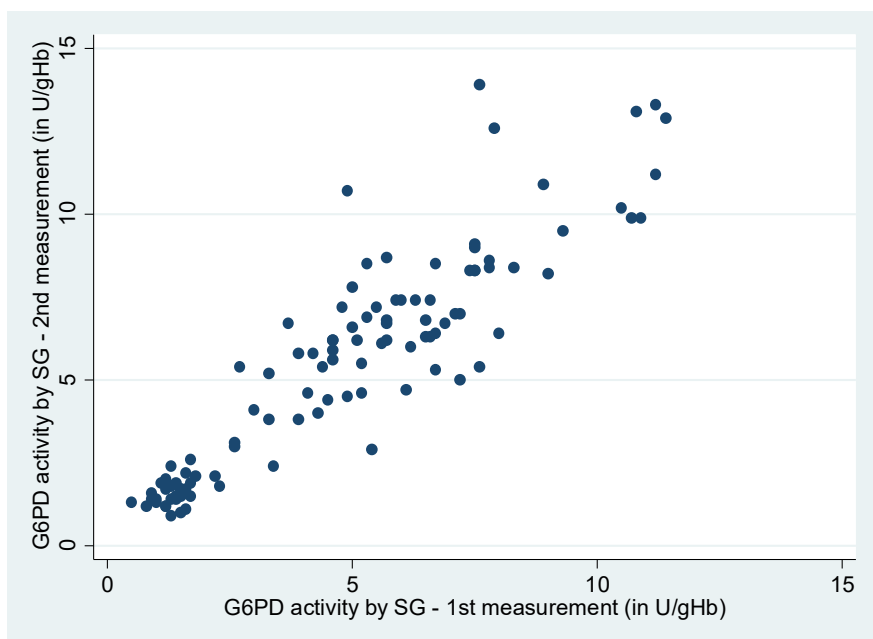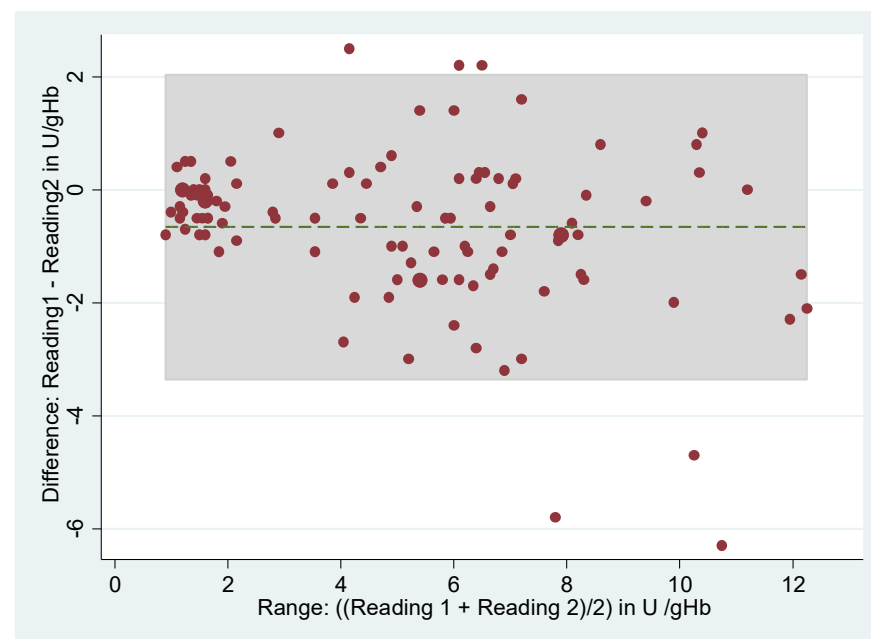

a)  $r_s=0.9025$ ;  $p<0.001$ ,  $n=106$  b) Mean difference:- 0.66 U/gHb, 95% LoA: -2.04 to 3.36 U/gHb (grey shaded area)
