# Supplementary material for: Field evaluation of quantitative point of care diagnostics to measure glucose-6-phosphate dehydrogenase activity
Source: PLOS journal article supplement (doi:10.1371/journal.pone.0206331), 2018-11-02
Supplement: S3 (10.1371/journal.pone.0206331.s003) [file journal.pone.0206331.s003]

**Supp. Figure 3: Comparison of the G6PD STANDARD (SG) in the lab and field a) Scatter plot and b) Bland-Altman plot**

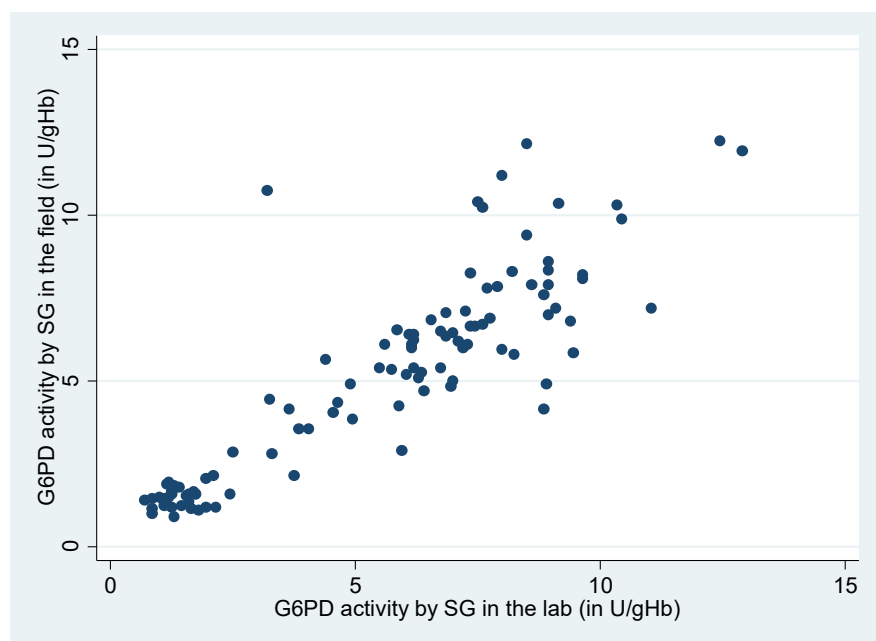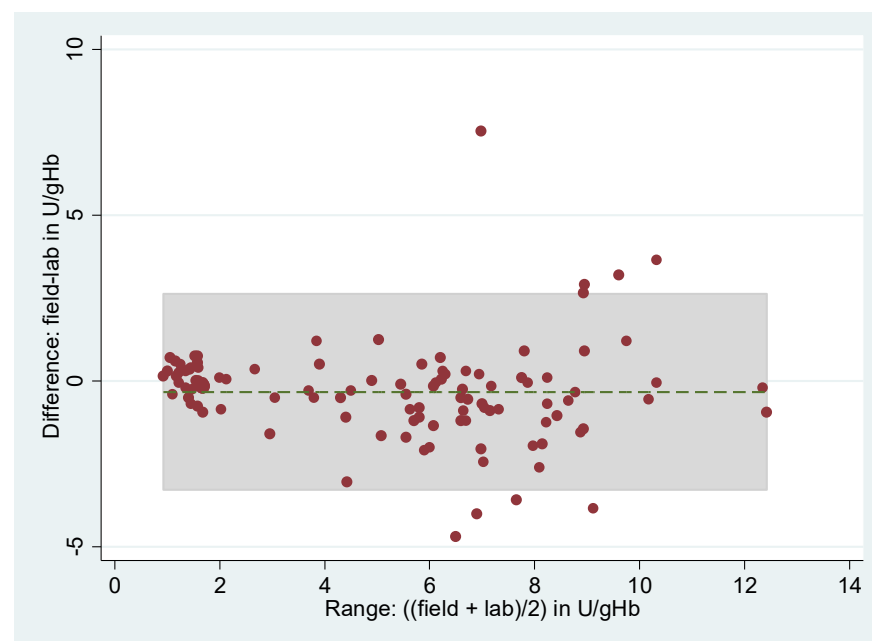

a)  $r_s=0.8765$ ;  $p<0.001$ ,  $n=106$  b) Mean difference:  $-0.33$  U/gHb, 95% LoA:  $-3.29$  to  $2.63$  U/gHb (grey shaded area)
