# Supplementary material for: Field evaluation of quantitative point of care diagnostics to measure glucose-6-phosphate dehydrogenase activity
Source: PLOS journal article supplement (doi:10.1371/journal.pone.0206331), 2018-11-02
Supplement: S5 (10.1371/journal.pone.0206331.s005) [file journal.pone.0206331.s005]

**Supp. Figure 5: Comparison of the MHD-1 in the lab against CBC-Hb a) Scatter plot and b) Bland-Altman plot**

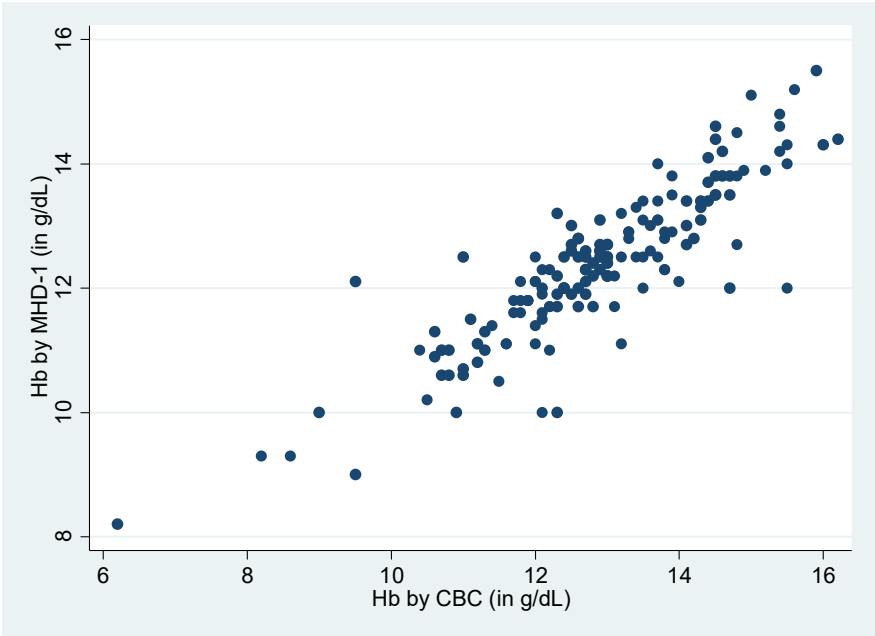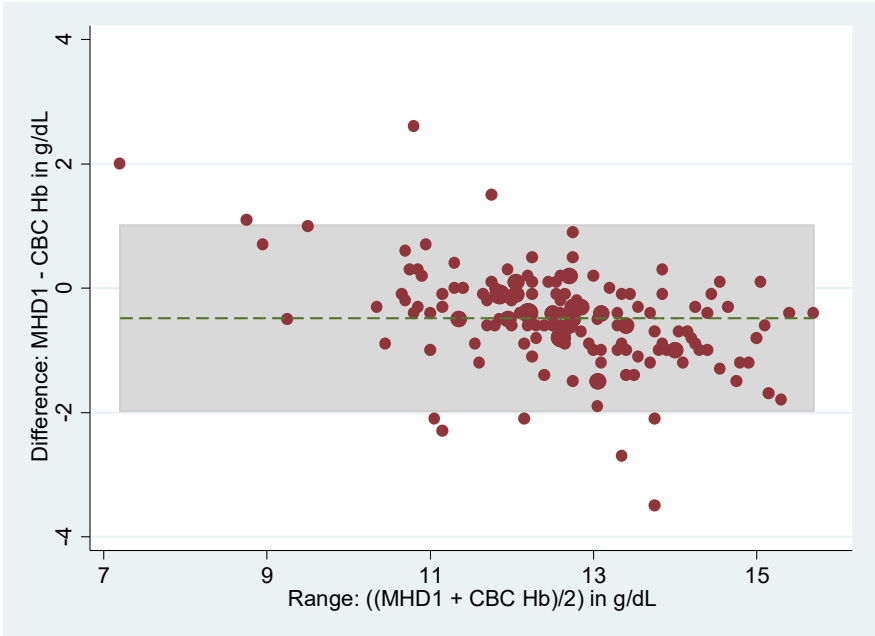

*a)  $r_s=0.8614$ ;  $p<0.001$ ,  $n=158$  b) Mean difference: 0.48 g/dL, 95% LoA: -1.98 to 1.01 g/dL (grey shaded area)*
