# Supplementary material for: Field evaluation of quantitative point of care diagnostics to measure glucose-6-phosphate dehydrogenase activity
Source: PLOS journal article supplement (doi:10.1371/journal.pone.0206331), 2018-11-02
Supplement: S6 (10.1371/journal.pone.0206331.s006) [file journal.pone.0206331.s006]

**Supp. Figure 6: Comparison of the SG-Hb in the lab against CBC-HB a) Scatter plot and b) Bland-Altman plot**

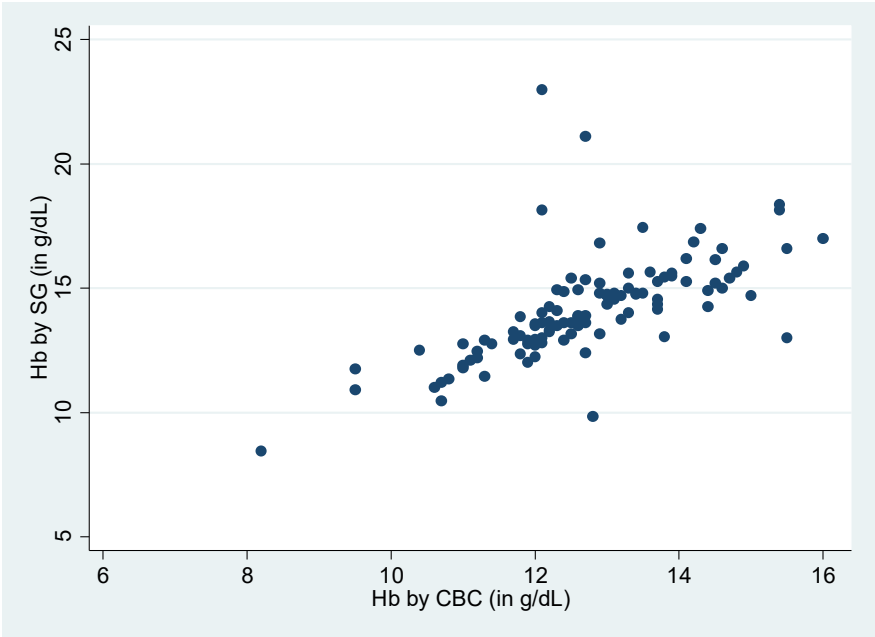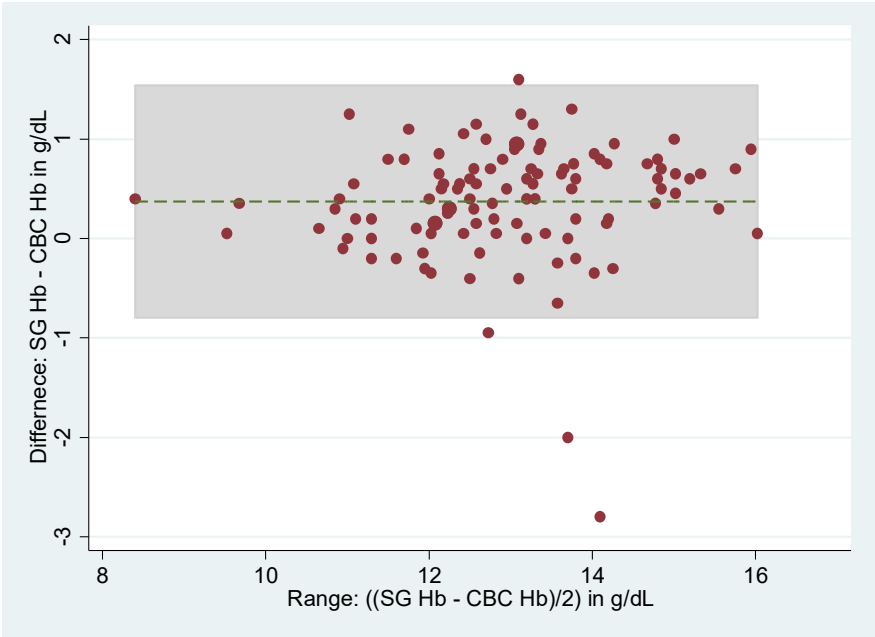

*a)  $r_s=0.8892$ ;  $p<0.001$ ,  $n=108$  b) Mean difference: 0.37 g/dL, 95% LoA: -0.80 to 1.54 g/dL (grey shaded area)*
